# Supplementary material
Source: Springer Nature journal article supplement (https://www.springermedizin.de/resource/supplementary/12913_2008_999_MOESM3_ESM.pdf/9536104)
Supplement: MOESM3 [file 9536104]

## Enquête du CRI

### Traitements par agents anti-TNF : quel bilan pré-thérapeutique ?

Frédéric Lioté, Thao Pham, Philippe Ravaud

Les traitements anti-TNF sont prescrits chez des patients atteints de PR ou de spondylarthropathies. Les indications sont actuellement libellées selon les AMM. Ils exposent à un certain nombre d'effets secondaires de sévérité variable pour lesquels il n'y a actuellement en France que peu de recommandations de pratiques ou de prescription d'examens pré-thérapeutiques. Chaque clinicien évalue le cas particulier de son patient selon sa propre expérience.

Au nom du CRI, nous vous proposons de répondre à une enquête anonyme à partir d'un cas clinique, simple et rapide, sur vos pratiques cliniques et les mesures que vous prenez chez vos patients avant prescription d'un traitement anti-TNF. Il s'agit de faire un instantané, un état des lieux des pratiques réelles dans notre pays.

---

Age : |\_|\_| ans

Sexe F  M

Année d'obtention de la spécialité : |\_|\_|\_|\_|

Membre de la SFR: Oui  Non

Modalités actuelles d'exercice :

- libéral exclusif
- praticien attaché hospitalier et exercice libéral
- hospitalier temps plein  temps partiel
- hospitalo-universitaire (PU-PH, PHU, MCU-PH)  CCA  interne de spécialité

Avez-vous déjà prescrit vous-même un traitement anti-TNF ?

Oui  Non

Dans le service hospitalier où vous exercez en consultation ou en salle, disposez-vous d'une liste systématique d'items et d'examens à vérifier avant prescription d'un anti-TNF ?

Oui  Non  Ne sait pas

Numéro d'anonymat : C

Femme, 50 ans, polyarthrite rhumatoïde séropositive (FR IgM) depuis 7 ans avec :

- Echappement à une bithérapie MTX (20 mg/sem PO) + Salazopyrine (2 g/j) + corticothérapie de 10 mg/j + AINS conventionnel à pleine dose.
- Antécédents :
  - o ménopause depuis 1 an non substituée, fibro-adénome mammaire
  - o hypothyroïdie secondaire à une maladie de Hashimoto
  - o Fille de 29 ans atteinte de la même dysthyroïdie
  - o Fracture de côte après chute au décours d'un vertige de Ménière
- Examen clinique
  - o Pression artérielle = 120/76, auscultation cardiopulmonaire normale
  - o Absence de nodule rhumatoïde ou de signe de vascularite

Vous voulez traiter cette patiente par un agent anti-TNF. Quel est votre bilan pré-thérapeutique (en dehors du bilan d'activité ou de sévérité de la maladie) ?

1. Quels antécédents recherchez-vous spécifiquement ?

|                                                       |                          |
|-------------------------------------------------------|--------------------------|
| a. primo-infection ou de tuberculose viscérale        | <input type="checkbox"/> |
| b. antécédent neurologique familial                   | <input type="checkbox"/> |
| c. infections ORL                                     | <input type="checkbox"/> |
| d. infections cutanées                                | <input type="checkbox"/> |
| e. néoplasie ou d'hémopathie                          | <input type="checkbox"/> |
| f. antécédent neurologique                            | <input type="checkbox"/> |
| g. thrombose veineuse et/ou d'embolie pulmonaire      | <input type="checkbox"/> |
| h. antécédent cardiovasculaire familial               | <input type="checkbox"/> |
| i. cirrhose                                           | <input type="checkbox"/> |
| j. arthrite septique                                  | <input type="checkbox"/> |
| k. septicémie                                         | <input type="checkbox"/> |
| l. antécédent diabétique familial                     | <input type="checkbox"/> |
| m. infections broncho-pulmonaires                     | <input type="checkbox"/> |
| n. infections urinaires                               | <input type="checkbox"/> |
| o. notion d'une positivité d'une IDR à la tuberculine | <input type="checkbox"/> |
| p. qualité d'un éventuel traitement anti-tuberculeux  | <input type="checkbox"/> |
| q. consommation alcool-tabagique                      | <input type="checkbox"/> |
| r. notion d'une vaccination par le BCG                | <input type="checkbox"/> |
| s. existence de prothèses articulaires                | <input type="checkbox"/> |
| t. gammopathie monoclonale                            | <input type="checkbox"/> |

2. Quel examen clinique pratiqueriez-vous personnellement ?

|                                    |                          |
|------------------------------------|--------------------------|
| a. examen ORL                      | <input type="checkbox"/> |
| b. auscultation cardiaque          | <input type="checkbox"/> |
| c. auscultation pulmonaire         | <input type="checkbox"/> |
| d. examen des aires ganglionnaires | <input type="checkbox"/> |
| e. examen neurologique             | <input type="checkbox"/> |
| f. état buccodentaire              | <input type="checkbox"/> |
| g. examen des téguments            | <input type="checkbox"/> |

3. Quels examens prescririez-vous ?

|                                           |                          |
|-------------------------------------------|--------------------------|
| a. électrophorèse des protides sériques   | <input type="checkbox"/> |
| b. radiographie pulmonaire                | <input type="checkbox"/> |
| c. détection des anticorps antinucléaires | <input type="checkbox"/> |
| d. dosage des transaminases               | <input type="checkbox"/> |
| e. sérologie du VIH                       | <input type="checkbox"/> |
| f. sérologie d'hépatite C                 | <input type="checkbox"/> |
| g. hémogramme                             | <input type="checkbox"/> |

4. Quelles autres mesures prendriez-vous ?

|                  |                          |
|------------------|--------------------------|
| a. IDR 10 Unités | <input type="checkbox"/> |
|------------------|--------------------------|
